# Supplementary material for: Site Density Functional Theory and Structural Bioinformatics Analysis of the SARS-CoV Spike Protein and hACE2 Complex
Source: MDPI journal article supplement (doi:10.3390/molecules27030799), 2022-01-26
Supplement: s1 [file s1]

# Supplementary Materials: SITE DENSITY FUNCTIONAL THEORY COMBINED WITH BIOINFORMATICS METHODS FOR THE SARS-CoV-2 SPIKE AND hACE2 COMPLEX

Nitesh Kumawat, Andrejs Tucs, Soumen Bera, Gennady N. Chuev, Marat Valiev, Marina V. Fedotova, Sergey E. Kruchinin, Koji Tsuda, Adnan Sljoka and Amit Chakraborty

**Table S1.** Interface residual interactions between CoV-RBD and hACE2

| SARS-CoV-1-RBD-hACE2 |            |        | SARS-CoV-2-RBD-hACE2 |            |
|----------------------|------------|--------|----------------------|------------|
| Receptor             | RBD Domain |        | Receptor             | RBD Domain |
| 1                    | TYR83      | ASN473 | LYS353               | GLY502     |
| 2                    | GLN24      | ASN473 | TYR41                | THR500     |
| 3                    | ASP38      | TYR436 | TYR41                | ASN501     |
| 4                    | GLU37      | TYR491 | ASP38                | TYR449     |
| 5                    | LYS353     | TYR481 | GLU35                | GLN493     |
| 6                    | LYS353     | GLY482 | THR27                | TYR489     |
| 7                    | LYS353     | GLY488 |                      |            |
| 8                    | TYR41      | THR486 |                      |            |
| 9                    | GLU329     | ARG426 |                      |            |

**Table S2.** Interface interactions between RBD and hACE2

|                                    | CoV-1-RBD-hACE2 | CoV-2-RBD-hACE2 |
|------------------------------------|-----------------|-----------------|
| No. of intermolecular contacts     | 55              | 59              |
| No. of charged-charged contacts    |                 | 1               |
| No. of charged-polar contacts      | 8               | 9               |
| No. of charged-apolar contacts     | 19              | 18              |
| No. of polar-polar contacts        | 2               | 4               |
| No. of apolar-polar contacts       | 17              | 18              |
| No. of apolar-apolar contacts      | 8               | 9               |
| Percentage of apolar NIS residues  | 34.96           | 36.60           |
| Percentage of charged NIS residues | 27.36           | 35.43           |

**Table S3.** 3DRISM parameters of calculated complexes

| complex                               | 6m17     | 2ajf     | 6vyb     |
|---------------------------------------|----------|----------|----------|
| Charge of clipped part                | 1.0      | -1.0     | 2.0      |
| Total number of heavy atoms           | 25344    | 12777    | 22365    |
| Number of heavy atoms of clipped part | 1244     | 1272     | 492      |
| Calculation box size (Å)              | 87×80×87 | 87×80×87 | 80×75×63 |

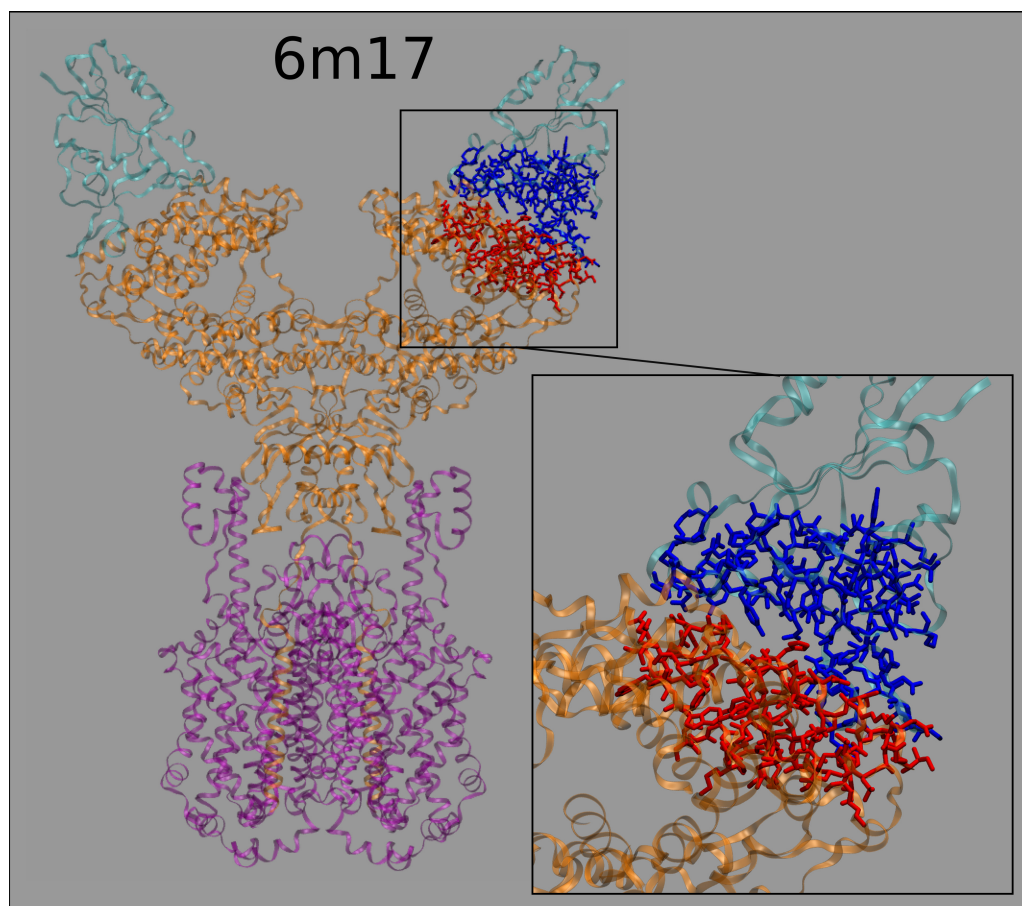

**Figure S1.** 6m17 complex. Purple ribbons - B(0)AT1 neutral amino acid transporter, orange ribbons - hACE2, cyan ribbons - surface spike of SARS-CoV-2, blue and red structures are parts of the spike and hACE2 used for 3DRISM calculations.

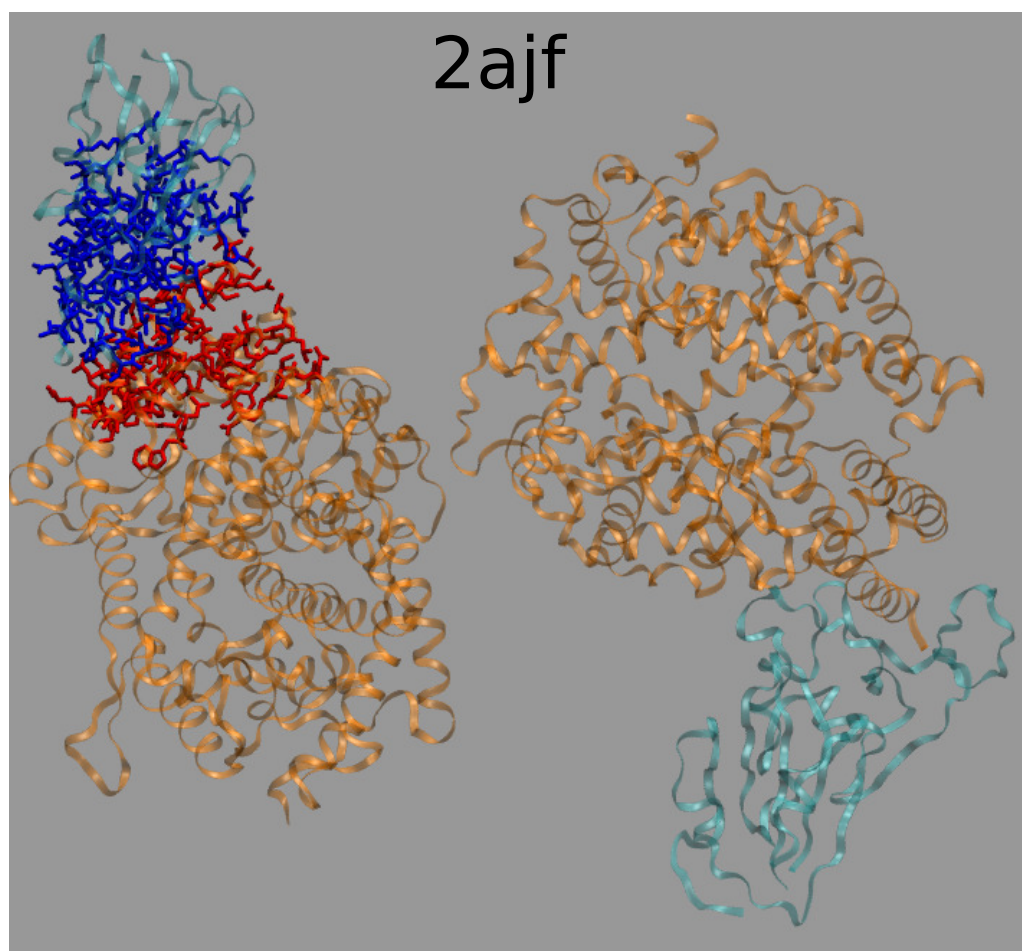

**Figure S2.** 2ajf complex. Orange ribbons - hACE2, cyan ribbons - spike of SARS-CoV, blue and red structures are parts of the spike and hACE2 used for 3DRISM calculations.

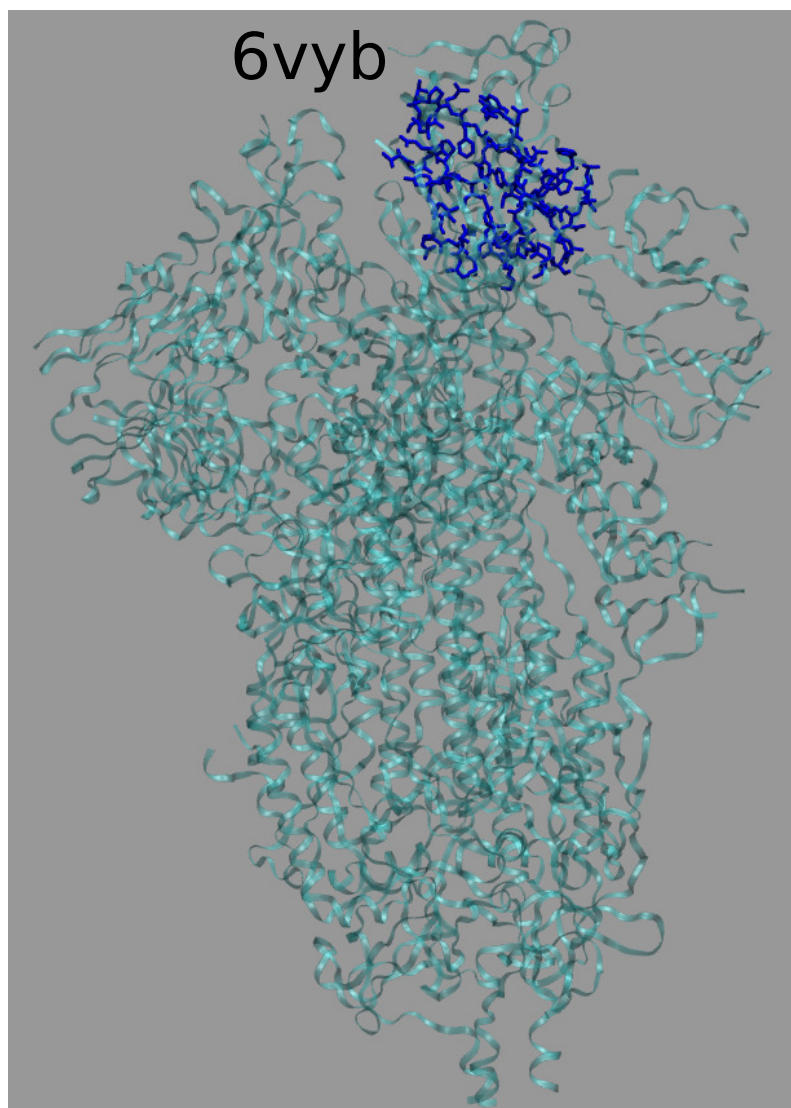

**Figure S3.** 6vyb complex. Cyan ribbons - spike of SARS-CoV-2, blue structure is a part of spike used for 3DRISM calculations

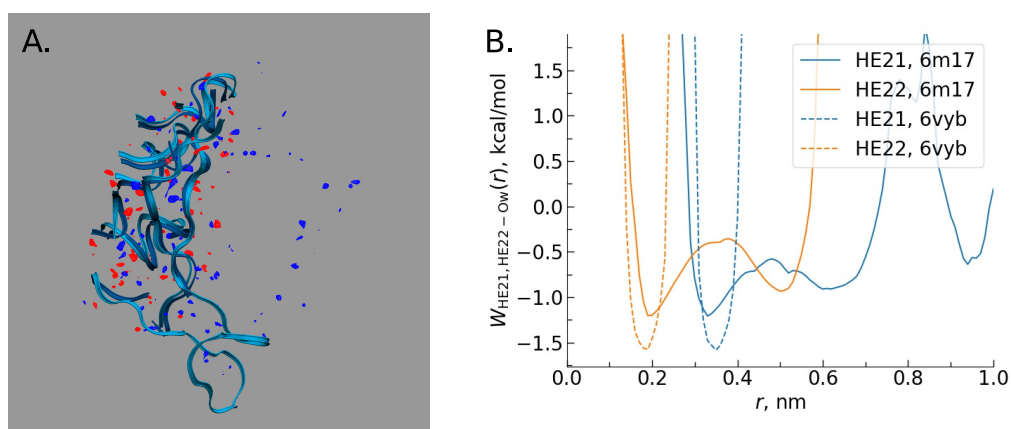

**Figure S4.** Water distribution around RBD of SARS-CoV-2. (A) Differences in distributions of water oxygen (blue) and water hydrogens (red) between the CoV-2/hACE2 and CoV-2. (B) The pmf of RBD-O and RBD-H for the CoV-2 and CoV-2/hACE2 complex. The RBD is indicated by blue ribbons, the RBD of CoV-2 is shown as background for the differences.

**Table S4.** Average RMSF values of the whole spike protein SARS-CoV-1 and SARSCoV-2 (top table). The corresponding values for the hACE2-RBD complex (bottom table). Highest value among SARS-CoV-1 and SARS-CoV-2 is indicated in bold.

| Cut-off (kcal/mol) | All domains     |            | RBD up           |                  |
|--------------------|-----------------|------------|------------------|------------------|
|                    | SARS-CoV-1      | SARS-CoV-2 | SARS-CoV-1       | SARS-CoV-2       |
| −1.0               | <b>6.5±3.9Å</b> | 5.9±4.7Å   | 17.7±5.6Å        | <b>18.0±7.9Å</b> |
| −2.0               | <b>8.7±5.6Å</b> | 6.1±4.3Å   | <b>20.1±6.2Å</b> | 16.4±6.8Å        |
| −3.0               | <b>9.4±5.8Å</b> | 6.5±4.4Å   | <b>24.8±7.9Å</b> | 16.6±6.8Å        |

  

| Cut-off (kcal/mol) | hACE2           |                 | RBD             |            |
|--------------------|-----------------|-----------------|-----------------|------------|
|                    | SARS-CoV-1      | SARS-CoV-2      | SARS-CoV-1      | SARS-CoV-2 |
| −1.0               | 3.5±1.1Å        | <b>4.0±1.3Å</b> | <b>5.7±2.1Å</b> | 4.8±1.9Å   |
| −2.0               | <b>4.4±1.4Å</b> | 4.3±1.4Å        | <b>7.0±2.9Å</b> | 5.5±2.3Å   |
| −3.0               | <b>4.9±1.8Å</b> | 4.7±1.4Å        | <b>7.7±3.1Å</b> | 6.3±2.5Å   |

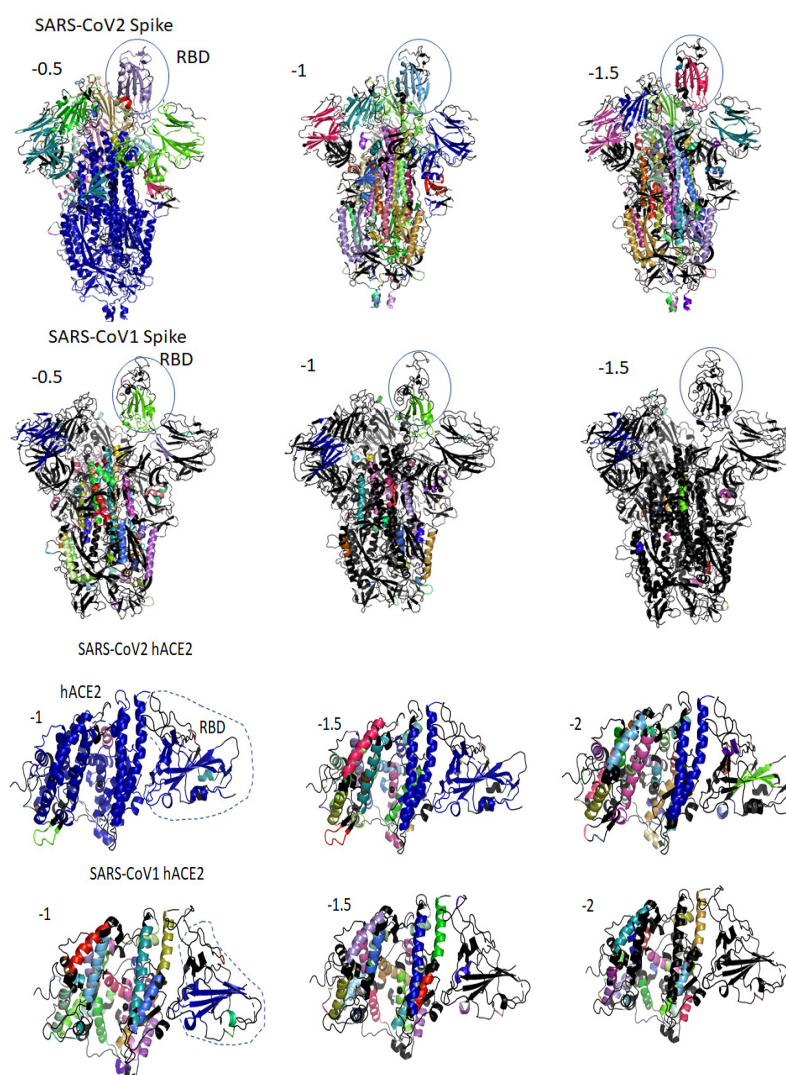

**Figure S5.** Rigidity analysis of protein structures. Individual colours indicate presence of large rigid clusters (blue being the largest rigid cluster), while black colour represents flexible regions.

**Table S5.** Summary of rigidity analysis

| Energy cutoff<br>(kcal/mol) | Bound/unbound (PDB IDs) |                        |                         |                         |
|-----------------------------|-------------------------|------------------------|-------------------------|-------------------------|
|                             | SARS-CoV-2<br>S (6vyb)  | SARS-CoV-1<br>S (6crz) | CoV1-RBD<br>ACE2 (2ajf) | CoV2-RBD<br>ACE2 (6m0j) |
| degree of freedoms          |                         |                        |                         |                         |
| -0.1                        | 3005                    | 3744                   | 823                     | 716                     |
| -0.5                        | 3468                    | 5310                   | 1002                    | 818                     |
| -1.0                        | 3881                    | 6480                   | 1204                    | 923                     |
| -1.5                        | 4279                    | 7307                   | 1371                    | 1064                    |
| -2.0                        | 4597                    | 7897                   | 1489                    | 1246                    |
| -2.5                        | 5075                    | 8343                   | 1642                    | 1387                    |
| -3.0                        | 5455                    | 8684                   | 1784                    | 1535                    |
| rigid clusters              |                         |                        |                         |                         |
| -0.1                        | 4502                    | 7273                   | 1223                    | 1028                    |
| -0.5                        | 6112                    | 11797                  | 2120                    | 1337                    |
| -1.0                        | 8224                    | 13052                  | 2560                    | 1607                    |
| -1.5                        | 9587                    | 13681                  | 2837                    | 2275                    |
| -2.0                        | 10259                   | 13979                  | 3015                    | 2702                    |
| -2.5                        | 10713                   | 14042                  | 3116                    | 2894                    |
| -3.0                        | 11261                   | 14076                  | 3199                    | 3003                    |
